# Supplementary material for: Conservation of land plant-specific receptor-like cytoplasmic kinase subfamily XI possessing a unique kinase insert domain
Source: Frontiers journal article supplement (doi:10.3389/fpls.2023.1117059), 2023-02-22
Supplement: Data_Sheet_1.PDF [file Data_Sheet_1.PDF]

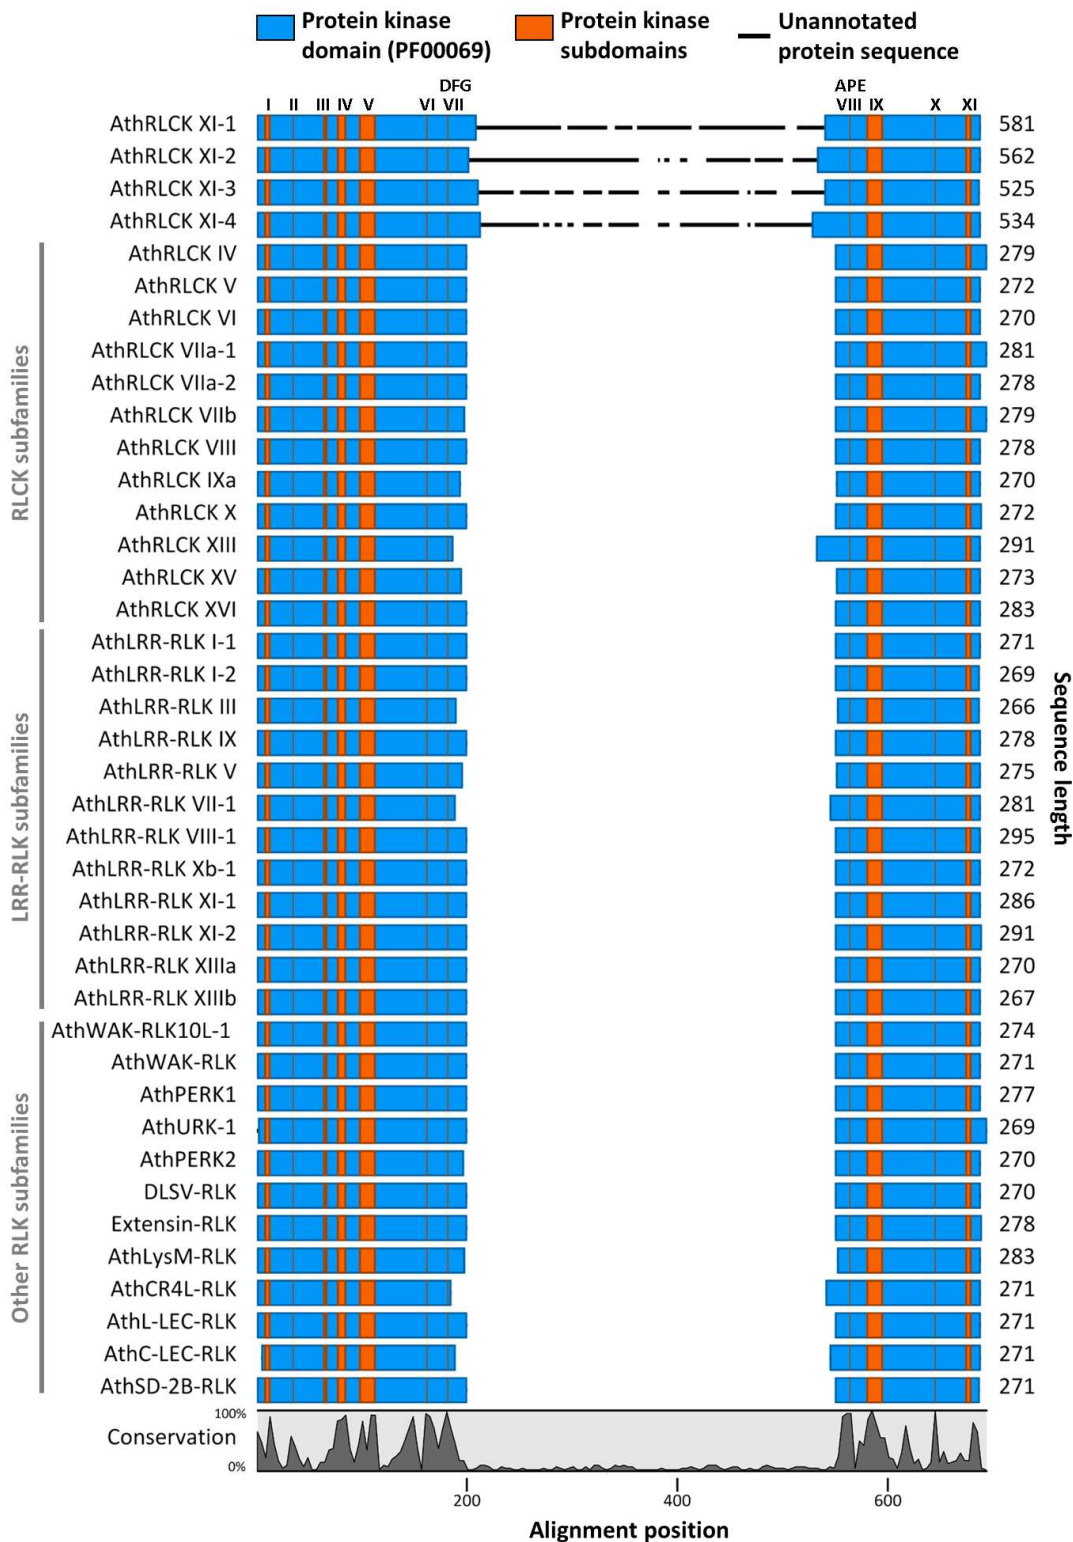

**Supplementary Figure 1. Members of RLCK XI from *A. thaliana* possess a kinase insert domain not found in other RLK subfamilies.**

Sequence alignment of the protein kinase domains of RLCK XI members, AthRLCK XI-1 (AT1G80870), AthRLCK XI-2 (AT2G45590), AthRLCK XI-3 (AT4G25390), AthRLCK XI-4 (AT5G51770), together with representative RLKs found in *A. thaliana*. The representative RLKs were categorized as RLCK, LRR-RLK, and other subfamilies. Each representative was chosen based on which subfamily member had the highest pairwise alignment score with AthRLCK XI-2. For RLCKs, AthRLCK IV (AT4G00330.1), AthRLCK V (AT1G09440.1), AthRLCK VI (AT2G18890.1), AthRLCK VIIa-1 (AT5G18610.1), AthRLCK VIIa-2 (AT2G26290.1), AthRLCK VIIb (AT1G24030.1), AthRLCK VIII (AT3G59350.1), AthRLCK IXa (AT3G26700.1), AthRLCK X (AT2G25220.1), AthRLCK XIII (AT1G33260.1), AthRLCK XV (AT3G15890.1), AthRLCK XVI (AT2G28250.1). For LRR-RLKs, AthLRR-RLK I-1 (AT3G46330.1), AthLRR-RLK I-1 (AT1G51810.1), AthLRR-RLK III (AT5G16590.1), AthLRR-RLK IX (AT1G66150.1), AthLRR-RLK V (AT4G22130.1), AthLRR-RLK VII-1 (AT1G12460.1), AthLRR-RLK VIII-1 (AT3G53590.1), AthLRR-RLK Xb-1 (AT2G02220.1), AthLRR-RLK XI-1 (AT1G09970.1), AthLRR-RLK XI-2 (AT2G31880.1), AthLRR-RLK XIIIa (AT1G78530.1), AthLRR-RLK XIIIb (AT5G07180.1). Other RLK subfamilies included AthWAK-RLK10L-1 (AT1G25390.1), AthWAK-RLK (AT1G21230.1), AthPERK1 (AT4G32710.1), AthPERK2 (AT3G13690.1), AthDLSV-RLK (AT4G23240.1), Extensin-RLK (AT3G58690.1), AthLysM-RLK (AT1G51940.1), CR4L-RLK (AT3G51990.1), AthL-LEC-RLK (AT5G01550.1), AthC-LEC-RLK (AT1G52310.1), AthSD-2B-RLK (AT5G24080.1). The location of conserved protein kinase subdomains (I-XI) on each sequence (orange) was indicated based on sequence alignment with well-characterized protein kinase sequences. An insertion domain in the RLCK XI members was identified between the conserved motifs Asp-Phe-Gly (DFG) and Ala-Pro-Glu (APE) of subdomain VII and subdomain VIII, respectively.

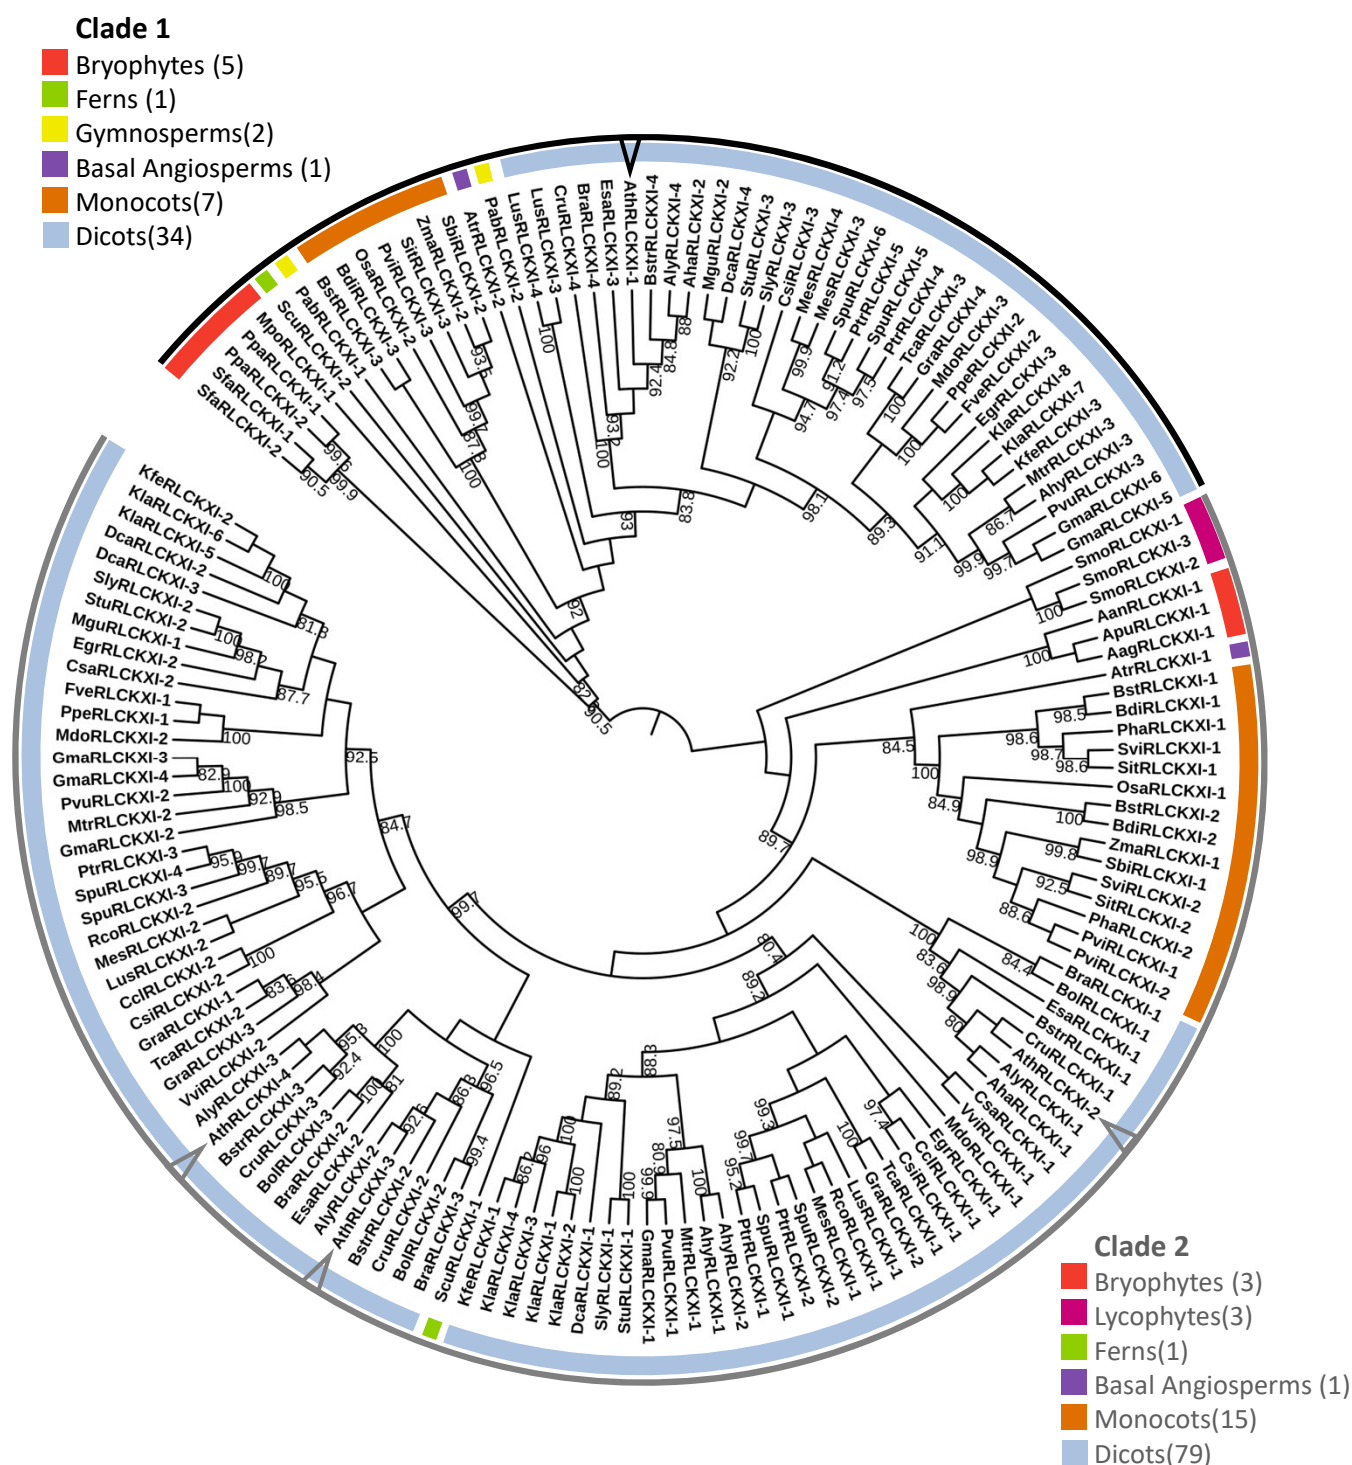

**Supplementary Figure 2. The KID of RLCK XI is conserved in land plants.**

The phylogenetic tree was constructed based on the protein sequence alignment of the KID of RLCK XI members. The alignment was used as input for IQ-TREE with the maximum-likelihood method. The clades are divided into two major clades (Clades 1 and 2), each containing members from different plant lineages represented by different colors. Members from *A. thaliana* are pointed at in the cladogram. Bootstrap replicates were set to 1000. Nodes showing bootstrap confidence of 80 or higher are shown. Visualization and annotation were conducted using iTOL.
